# Supplementary material for: CaM Kinase II mediates maladaptive post-infarct remodeling and pro-inflammatory chemoattractant signaling but not acute myocardial ischemia/reperfusion injury
Source: PubMed Central journal article supplement (PMC4287929; doi:10.15252/emmm.201403848), 2014-09-05

Full uncut gels of Supporting Information Fig 4:

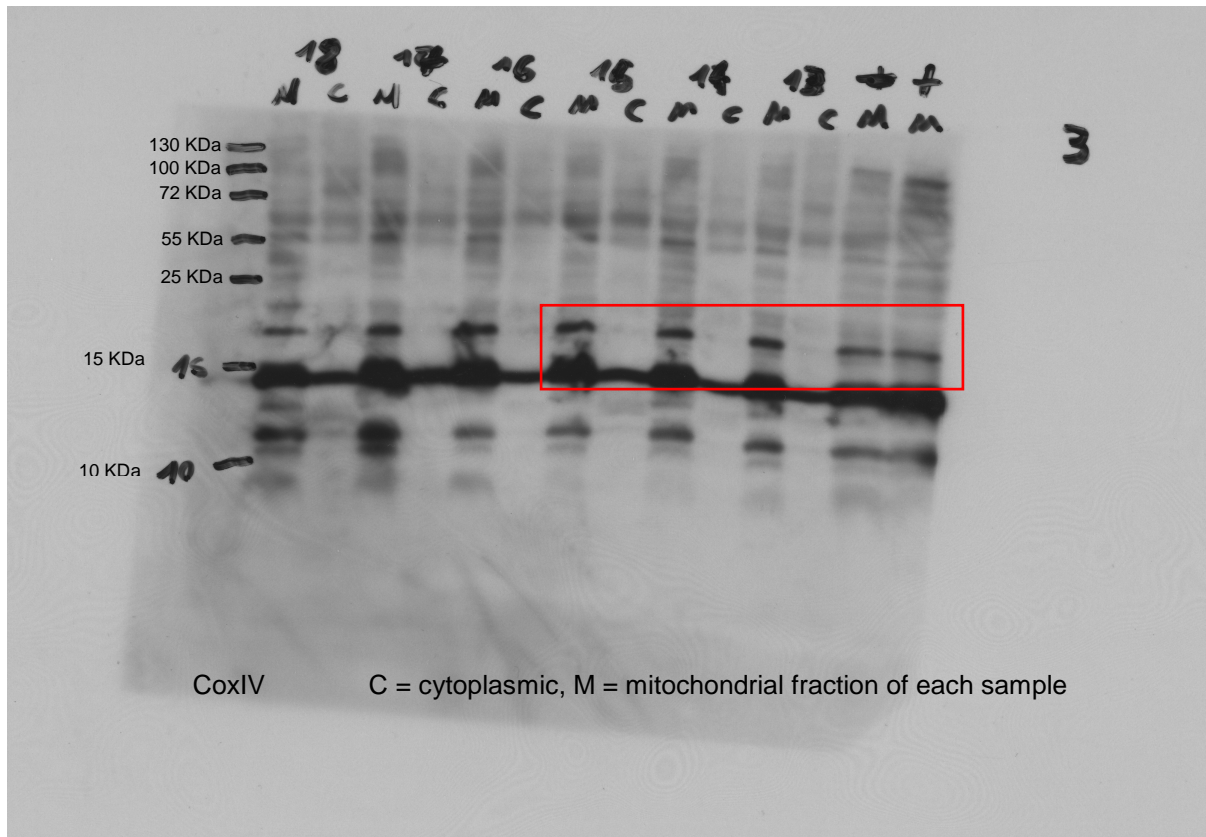

Supplement: emmm0006-1231-sd2.pdf [file emmm0006-1231-sd2.pdf]
